# Supplementary material for: Vaccinia Virus Expressing Interferon Regulatory Factor 3 Induces Higher Protective Immune Responses against Lethal Poxvirus Challenge in Atopic Organism
Source: Viruses. 2021 Oct 3;13(10):1986. doi: 10.3390/v13101986 (PMC8539567; doi:10.3390/v13101986)
Supplement: Supplementary file 1 [file viruses-13-01986-s001.zip › viruses-1385705-SI.pdf]

# Vaccinia Virus Expressing Interferon Regulatory Factor 3 Induces Higher Protective Immune Responses against Lethal Poxvirus Challenge in Atopic Organism

Hana Pilna <sup>1,2,&</sup>, Vera Hajkova <sup>1,2,&</sup>, Jarmila Knitlova <sup>1,#</sup>, Jana Liskova <sup>1,#</sup>, Jana Elsterova<sup>1,†</sup>, and Zora Melkova <sup>1,2,\*</sup>

<sup>1</sup> Department of Immunology and Microbiology, First Faculty of Medicine, Charles University, Studnickova 7, 128 00 Prague 2, Czech Republic; pilna.hana@gmail.com (HP); gugpacenpo@seznam.cz (VH); jarmila.knitlova@gmail.com (JK); janefox@biolog.cz (JL); elsterova@paru.cas.cz (JE); zmelk@LF1.cuni.cz (ZM)

<sup>2</sup> BIOCEV, Biotechnology and Biomedicine Center of the Academy of Sciences and Charles University in Vestec, Průmyslová 595, 252 50 Vestec, Czech Republic

\* Correspondence: zmelk@LF1.cuni.cz; Tel.: +420-22496 8507

& The authors contributed equally to this work

# Current affiliation: Department of Biomaterials and Tissue Engineering, Institute of Physiology, Czech Academy of Sciences, Videnska 1083, 142 20 Prague 4, Czech Republic

† Current affiliation: Institute of Parasitology, Biology Centre, Czech Academy of Sciences, Branisovska 31, 370 05 Ceske Budejovice, Czech Republic and Veterinary Research Institute, Hudcova 296/70, 621 00 Brno, Czech Republic

## Supplements

Figure S1

(a)

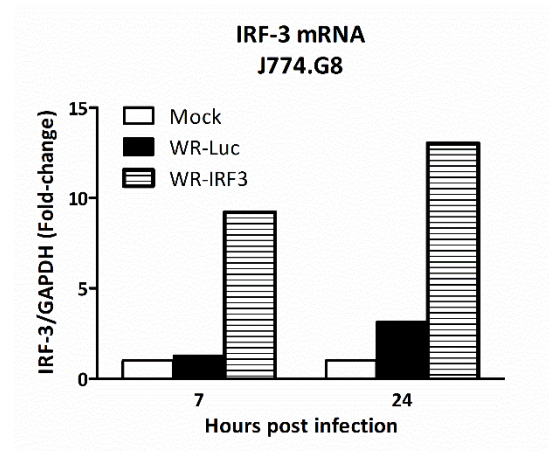

(b)

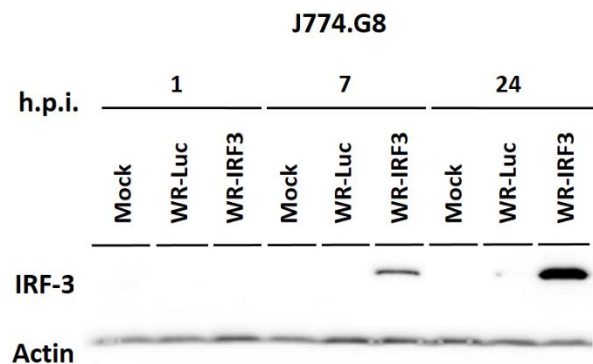

**Figure S1.** Expression of mouse IRF-3 by WR-IRF3 in J774.G8 monocyte/macrophage cell line. The cells were mock-infected or infected with WR-Luc or WR-IRF3 at M.O.I. 1. At individual time points, the cells were collected and used for further analysis. (a) 1-step RT-qPCR analysis at 24 h.p.i.. IRF-3 mRNA was normalized to GAPDH mRNA and expressed relatively as a fold-change compared to mock-infected cells. (b) Western blot analysis. The cell lysates were resolved by 12 % SDS-PAGE. IRF-3 and control  $\beta$ -actin were detected by western blot analysis and chemiluminescence. Mock – mock-infected cells; WR-Luc – cells infected with VACV expressing luciferase; WR-IRF3 – cells infected with VACV expressing Mu IRF-3.

**Figure S2**

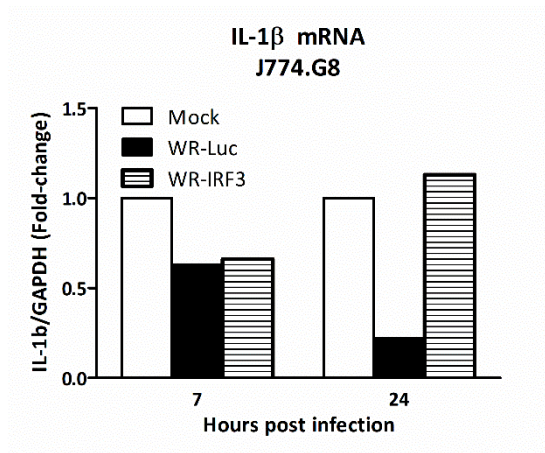

**Figure S2.** Infection with WR-IRF3 increases mRNA levels of IL-1 $\beta$  in J774.G8 monocyte/macrophage cell line. The cells were mock-infected or infected with WR-Luc or WR-IRF3 at M.O.I. 1. At indicated time points, the cells were collected and used for 1-step RT-qPCR analysis. IL-1 $\beta$  mRNA was normalized to GAPDH mRNA and expressed relatively as a fold-change compared to mock-infected cells. Mock – mock-infected cells; WR-Luc – cells infected with VACV expressing luciferase; WR-IRF3 – cells infected with VACV expressing Mu IRF-3.

**Figure S3**

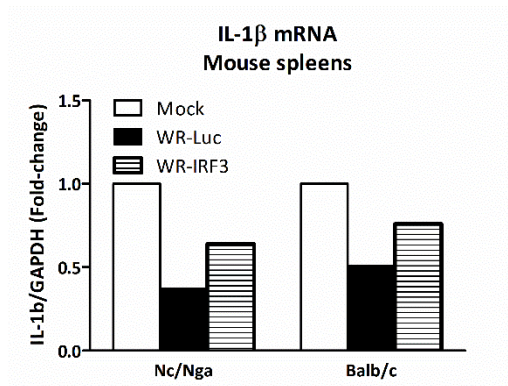

**Figure S3.** Intranasal infection with WR-IRF3 supports higher mRNA levels of IL-1 $\beta$  in spleens of Nc/Nga and Balb/c mice. The mice were i.n. mock-infected with PBS or infected with  $4.37 \times 10^5$  PFU of a purified stock of WR-Luc or WR-IRF3. At 3 days p.i., the mice were sacrificed and spleens were used for 1-step RT-qPCR analysis. IL-1 $\beta$  mRNA was normalized to GAPDH mRNA and expressed relatively as a fold-change compared to mock-infected samples.  $n = 3$  mice/group. Mock – mock-infected mice; WR-Luc – mice infected with VACV expressing luciferase; WR-IRF3 – mice infected with VACV expressing Mu IRF-3.

**Figure S4**

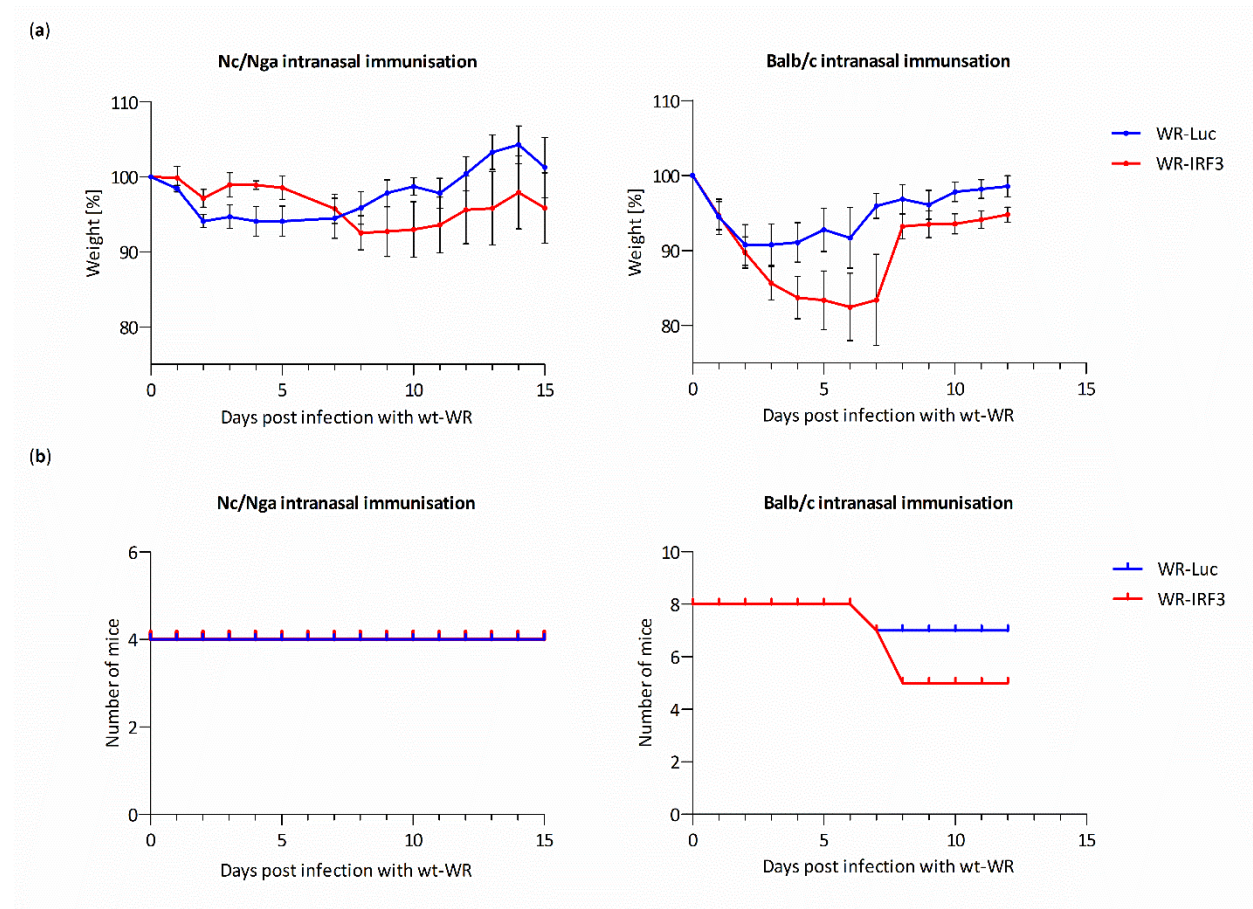

**Figure S4.** Intranasal immunization with WR-Luc and WR-IRF3 and protective immunity against a lethal challenge with wt-WR. Nc/Nga and Balb/c mice were immunized i.n. ( $10^4$  PFU/mouse) with purified WR-Luc or WR-IRF3. 24 days later (day 0 in the graphs), they were infected i.n. with a lethal dose of wt-WR ( $10^5$  PFU/mouse). Changes in body weight (a) and survival (b) of mice are presented. (a) Graphs represent means  $\pm$  S.E.M.

Figure S5  
(a)

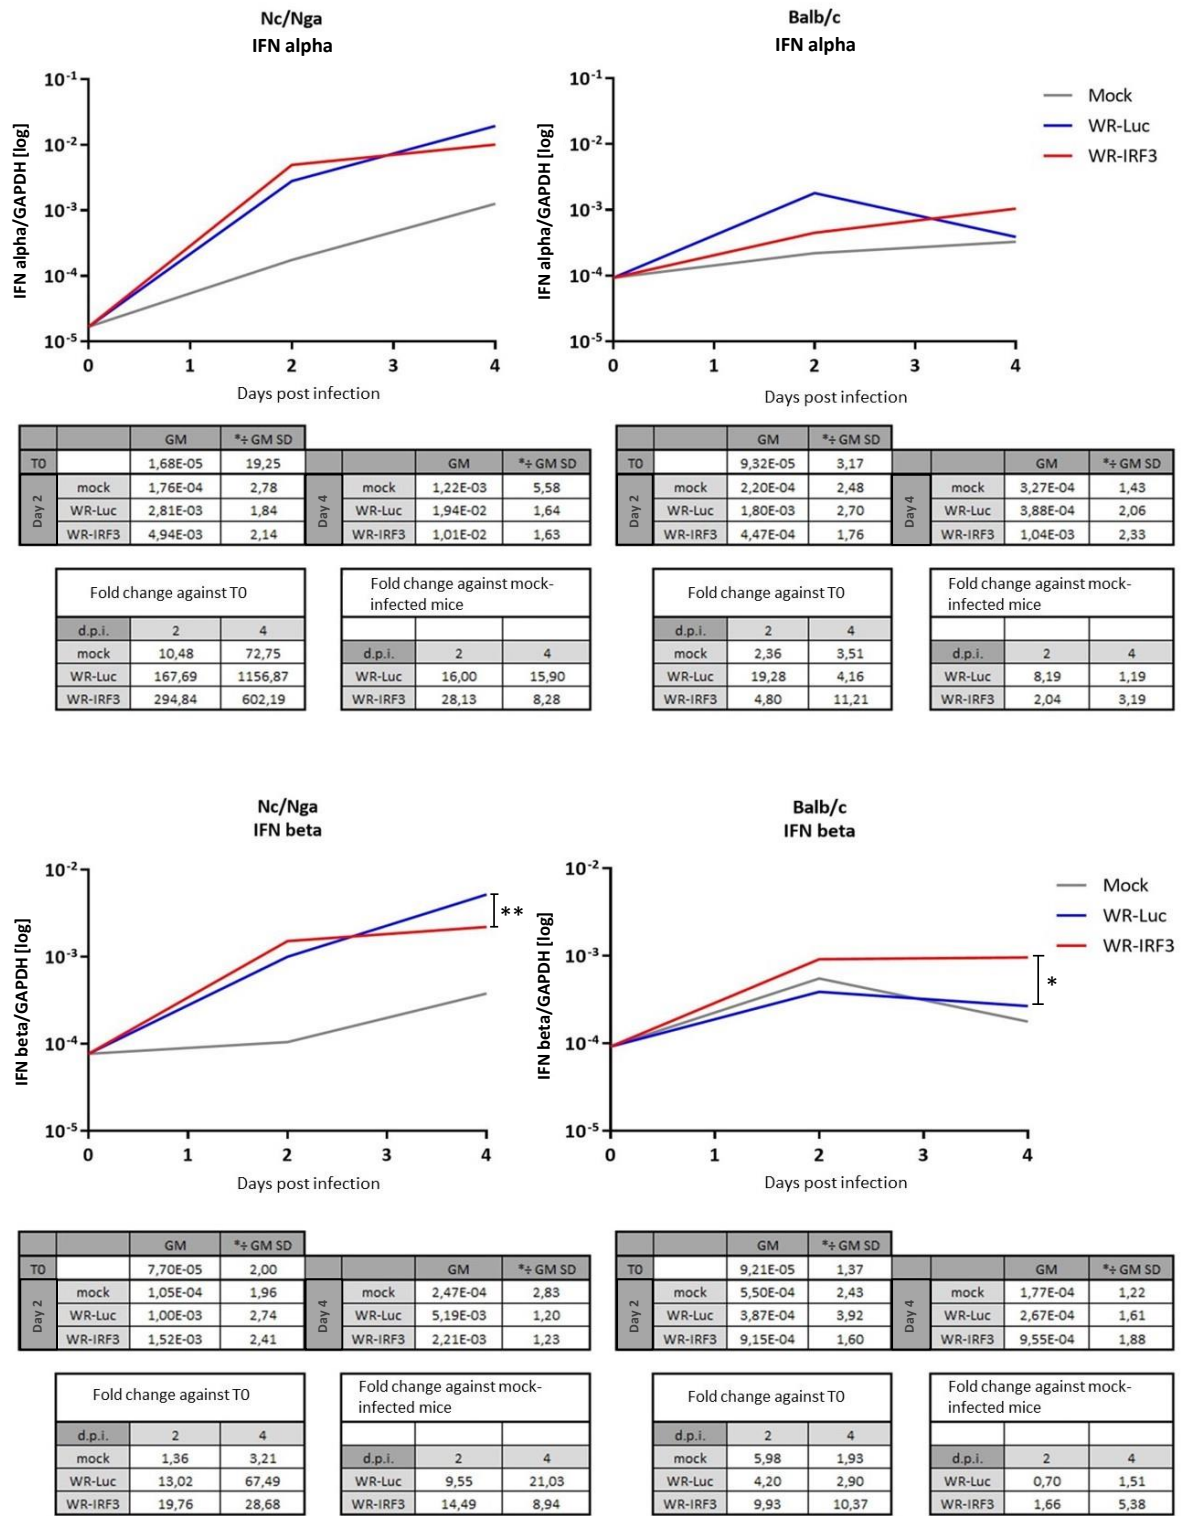

(b)

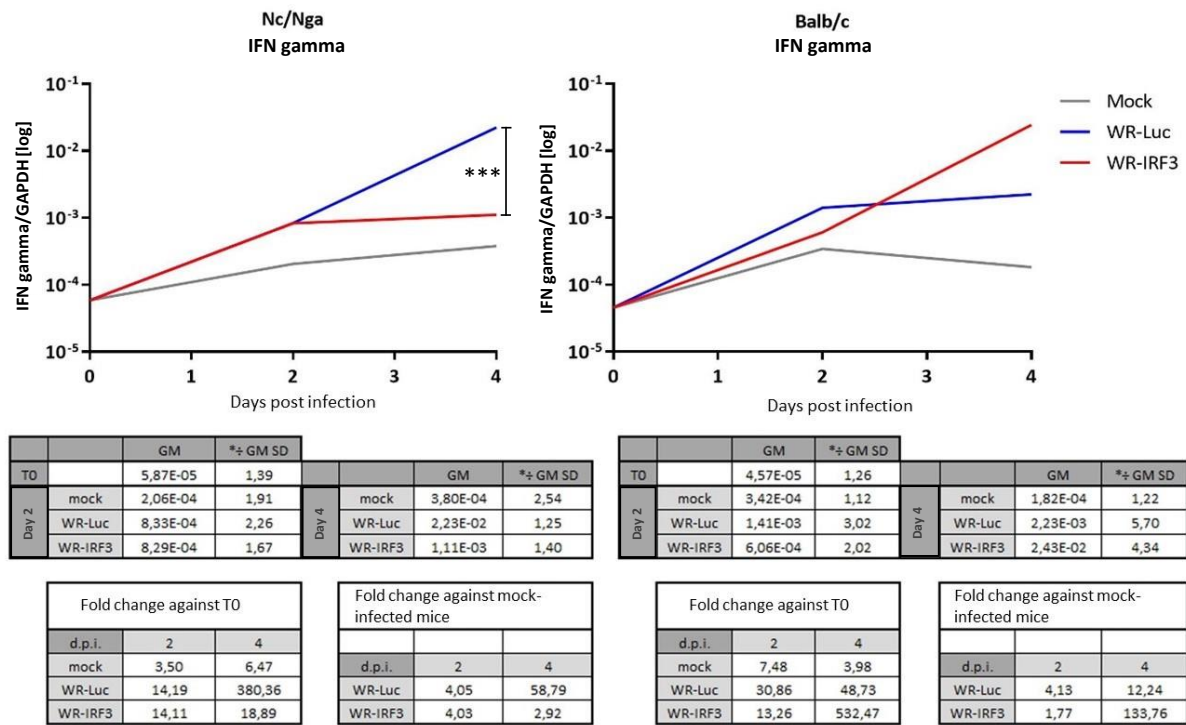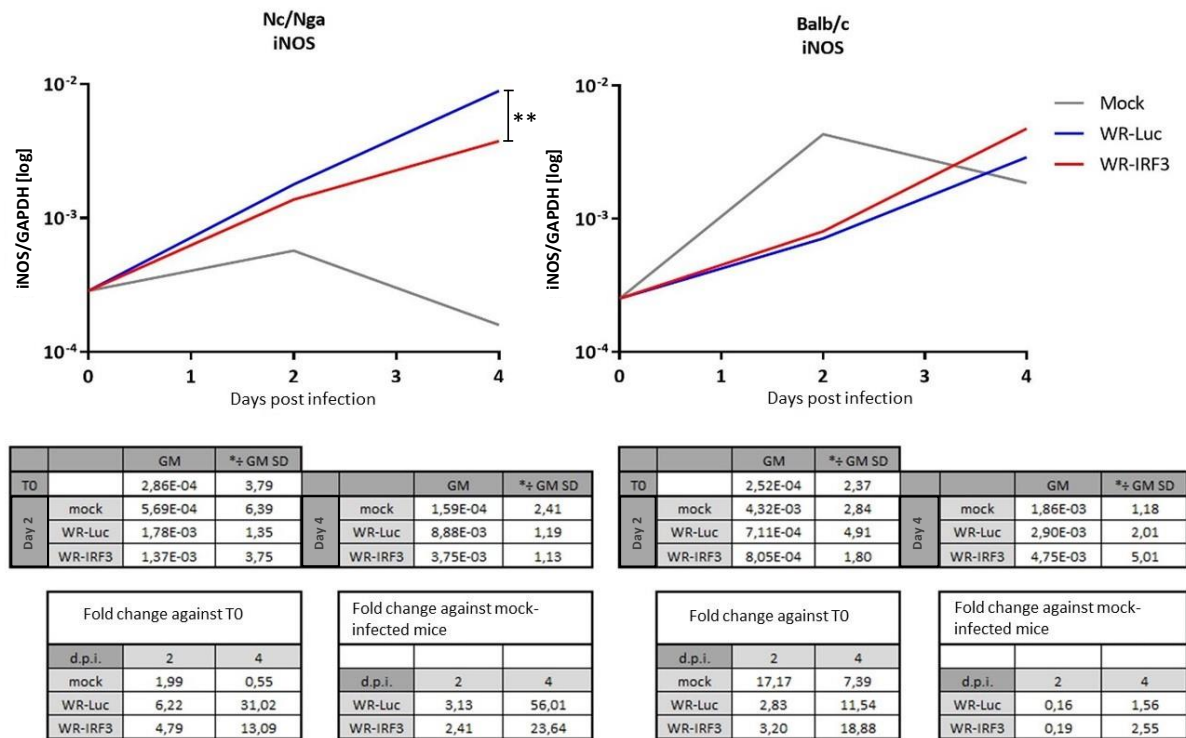

(c)

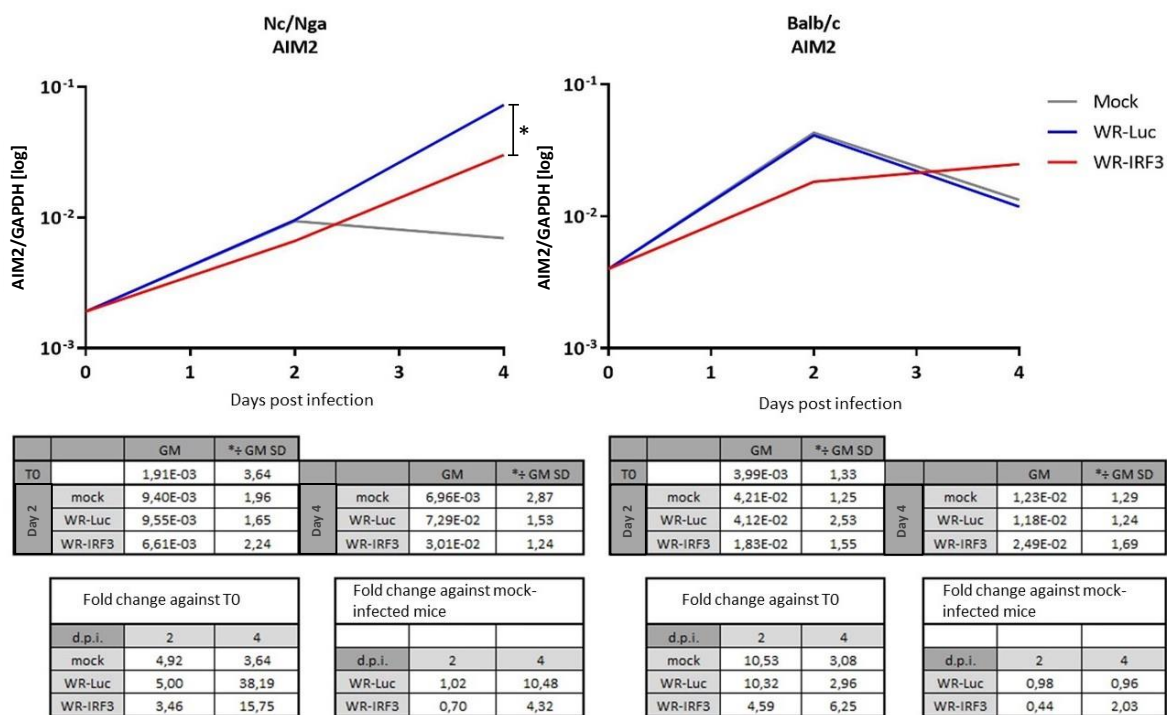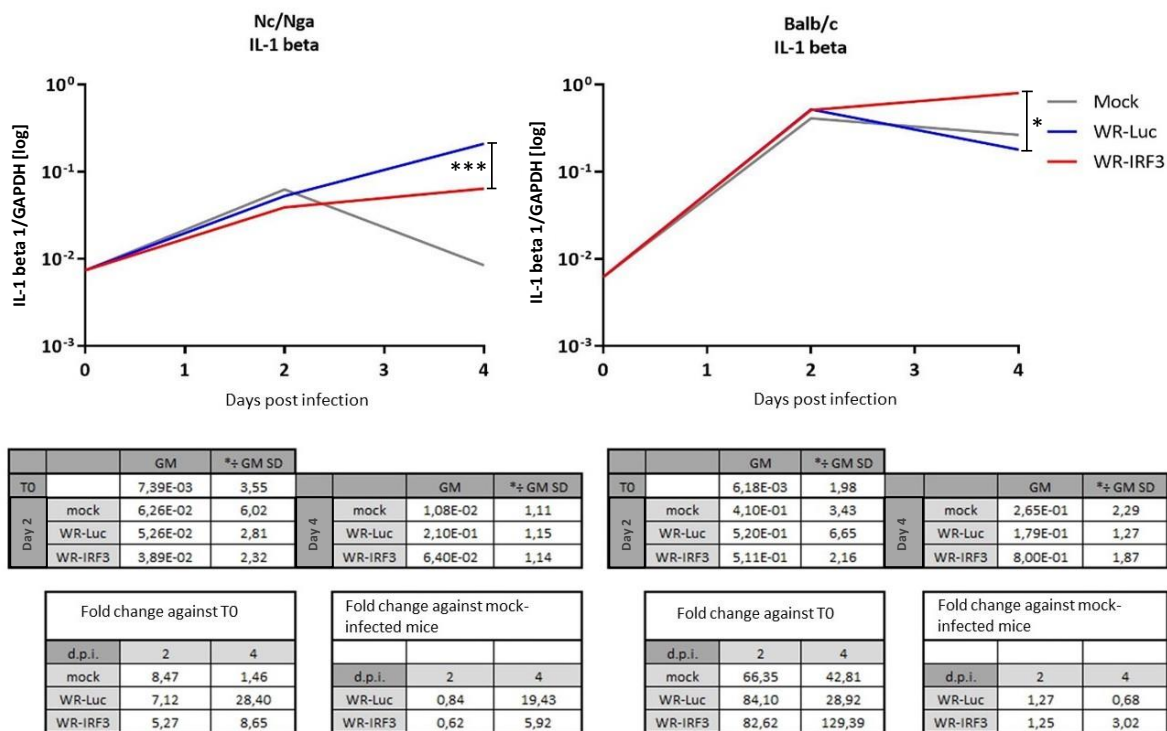

(d)

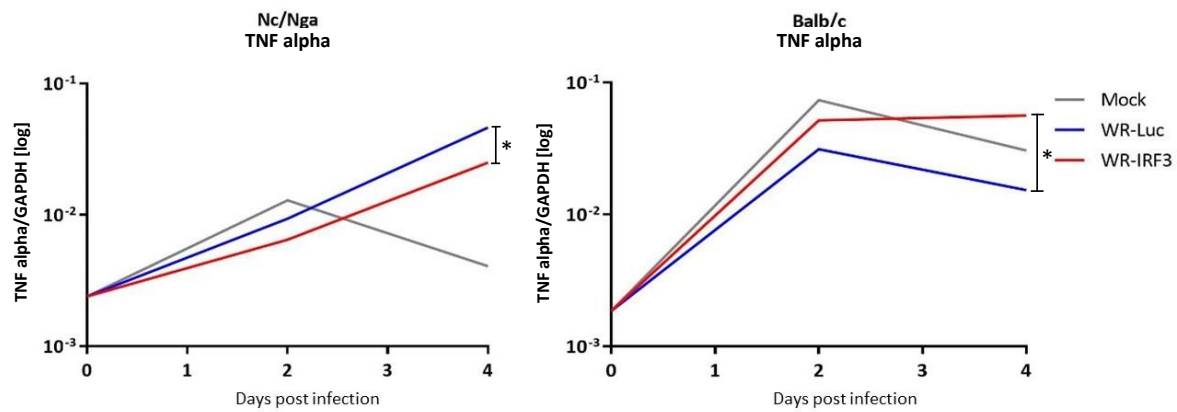

|       |         | GM       | *± GM SD |       |         | GM       | *± GM SD |
|-------|---------|----------|----------|-------|---------|----------|----------|
| Day 2 | TO      | 2,39E-03 | 2,14     | Day 4 | mock    | 4,06E-03 | 1,16     |
|       | mock    | 1,29E-02 | 3,31     |       | WR-Luc  | 4,62E-02 | 1,18     |
|       | WR-Luc  | 9,36E-03 | 1,26     |       | WR-IRF3 | 2,50E-02 | 1,24     |
|       | WR-IRF3 | 6,48E-03 | 2,04     |       |         |          |          |

| Fold change against T0 |      |       |
|------------------------|------|-------|
| d.p.i.                 | 2    | 4     |
| mock                   | 5,41 | 1,70  |
| WR-Luc                 | 3,92 | 19,32 |
| WR-IRF3                | 2,71 | 10,48 |

| Fold change against mock-infected mice |      |       |
|----------------------------------------|------|-------|
| d.p.i.                                 | 2    | 4     |
| WR-Luc                                 | 0,72 | 11,37 |
| WR-IRF3                                | 0,50 | 6,17  |

|       |         | GM       | *± GM SD |       |         | GM       | *± GM SD |
|-------|---------|----------|----------|-------|---------|----------|----------|
| Day 2 | TO      | 1,86E-03 | 1,42     | Day 4 | mock    | 3,05E-02 | 2,57     |
|       | mock    | 7,35E-02 | 4,61     |       | WR-Luc  | 1,53E-02 | 1,61     |
|       | WR-Luc  | 3,12E-02 | 5,42     |       | WR-IRF3 | 5,62E-02 | 1,79     |
|       | WR-IRF3 | 5,15E-02 | 1,70     |       |         |          |          |

| Fold change against T0 |       |       |
|------------------------|-------|-------|
| d.p.i.                 | 2     | 4     |
| mock                   | 39,47 | 16,37 |
| WR-Luc                 | 16,76 | 8,21  |
| WR-IRF3                | 27,64 | 30,19 |

| Fold change against mock-infected mice |      |      |
|----------------------------------------|------|------|
| d.p.i.                                 | 2    | 4    |
| WR-Luc                                 | 0,42 | 0,50 |
| WR-IRF3                                | 0,70 | 1,84 |

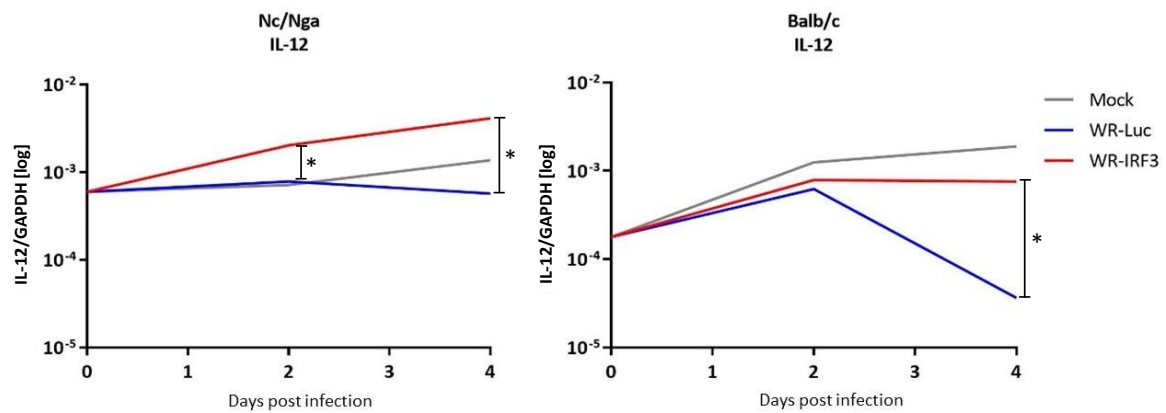

|       |         | GM       | *± GM SD |       |         | GM       | *± GM SD |
|-------|---------|----------|----------|-------|---------|----------|----------|
| Day 2 | TO      | 5,96E-04 | 3,25     | Day 4 | mock    | 1,37E-03 | 1,50     |
|       | mock    | 7,15E-04 | 1,75     |       | WR-Luc  | 5,70E-04 | 1,95     |
|       | WR-Luc  | 7,82E-04 | 1,57     |       | WR-IRF3 | 4,12E-03 | 1,94     |
|       | WR-IRF3 | 2,02E-03 | 1,39     |       |         |          |          |

| Fold change against T0 |      |      |
|------------------------|------|------|
| d.p.i.                 | 2    | 4    |
| mock                   | 1,20 | 2,29 |
| WR-Luc                 | 1,31 | 0,96 |
| WR-IRF3                | 3,40 | 6,91 |

| Fold change against mock-infected mice |      |      |
|----------------------------------------|------|------|
| d.p.i.                                 | 2    | 4    |
| WR-Luc                                 | 1,09 | 0,42 |
| WR-IRF3                                | 2,83 | 3,02 |

|       |         | GM       | *± GM SD |       |         | GM       | *± GM SD |
|-------|---------|----------|----------|-------|---------|----------|----------|
| Day 2 | TO      | 1,78E-04 | 2,67     | Day 4 | mock    | 1,89E-03 | 1,52     |
|       | mock    | 1,25E-03 | 1,70     |       | WR-Luc  | 3,65E-05 | 1,95     |
|       | WR-Luc  | 6,22E-04 | 10,14    |       | WR-IRF3 | 7,58E-04 | 3,78     |
|       | WR-IRF3 | 7,88E-04 | 2,62     |       |         |          |          |

| Fold change against T0 |      |       |
|------------------------|------|-------|
| d.p.i.                 | 2    | 4     |
| mock                   | 7,01 | 10,64 |
| WR-Luc                 | 3,50 | 0,21  |
| WR-IRF3                | 4,44 | 4,26  |

| Fold change against mock-infected mice |      |      |
|----------------------------------------|------|------|
| d.p.i.                                 | 2    | 4    |
| WR-Luc                                 | 0,50 | 0,02 |
| WR-IRF3                                | 0,63 | 0,40 |

(e)

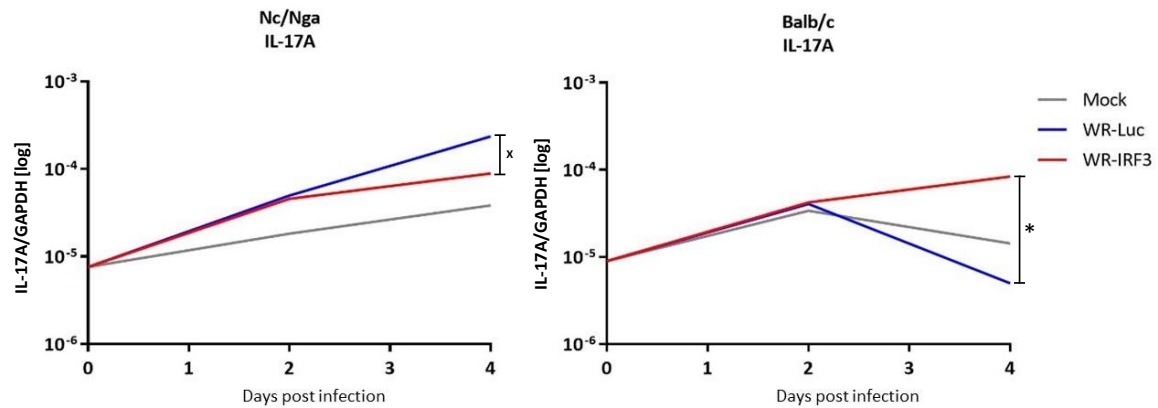

| Nc/Nga IL-17A |         |          |          | Balb/c IL-17A |         |          |          |
|---------------|---------|----------|----------|---------------|---------|----------|----------|
|               |         | GM       | *± GM SD |               |         | GM       | *± GM SD |
| T0            |         | 7,61E-06 | 1,88     | T0            |         | 5,08E-06 | 2,83     |
| Day 2         | mock    | 1,83E-05 | 1,41     | Day 2         | mock    | 3,39E-05 | 1,97     |
|               | WR-Luc  | 4,96E-05 | 2,55     |               | WR-Luc  | 4,06E-05 | 3,93     |
|               | WR-IRF3 | 4,91E-05 | 2,62     |               | WR-IRF3 | 4,24E-05 | 3,17     |
|               |         |          |          |               |         |          |          |
| Day 4         | mock    | 1,64E-05 | 2,07     | Day 4         | mock    | 1,43E-05 | 4,30     |
|               | WR-Luc  | 2,35E-04 | 1,80     |               | WR-Luc  | 5,00E-06 | 3,48     |
|               | WR-IRF3 | 8,91E-05 | 1,61     |               | WR-IRF3 | 8,38E-05 | 2,87     |

  

| Nc/Nga IL-17A          |  |        |       | Balb/c IL-17A          |  |        |       |
|------------------------|--|--------|-------|------------------------|--|--------|-------|
| Fold change against T0 |  | d.p.i. |       | Fold change against T0 |  | d.p.i. |       |
|                        |  | 2      | 4     |                        |  | 2      | 4     |
| mock                   |  | 2,40   | 2,16  | mock                   |  | 6,67   | 2,81  |
| WR-Luc                 |  | 6,52   | 30,82 | WR-Luc                 |  | 8,00   | 0,98  |
| WR-IRF3                |  | 6,45   | 11,71 | WR-IRF3                |  | 8,34   | 16,49 |

  

| Nc/Nga IL-17A                          |  |        |       | Balb/c IL-17A                          |  |        |      |
|----------------------------------------|--|--------|-------|----------------------------------------|--|--------|------|
| Fold change against mock-infected mice |  | d.p.i. |       | Fold change against mock-infected mice |  | d.p.i. |      |
|                                        |  | 2      | 4     |                                        |  | 2      | 4    |
| WR-Luc                                 |  | 2,71   | 14,30 | WR-Luc                                 |  | 1,20   | 0,35 |
| WR-IRF3                                |  | 2,49   | 5,43  | WR-IRF3                                |  | 1,25   | 5,86 |

  

| Balb/c IL-17A                          |  |        |      | Balb/c IL-17A                          |  |        |      |
|----------------------------------------|--|--------|------|----------------------------------------|--|--------|------|
| Fold change against mock-infected mice |  | d.p.i. |      | Fold change against mock-infected mice |  | d.p.i. |      |
|                                        |  | 2      | 4    |                                        |  | 2      | 4    |
| WR-Luc                                 |  | 1,20   | 0,35 | WR-Luc                                 |  | 1,20   | 0,35 |
| WR-IRF3                                |  | 1,25   | 5,86 | WR-IRF3                                |  | 1,25   | 5,86 |

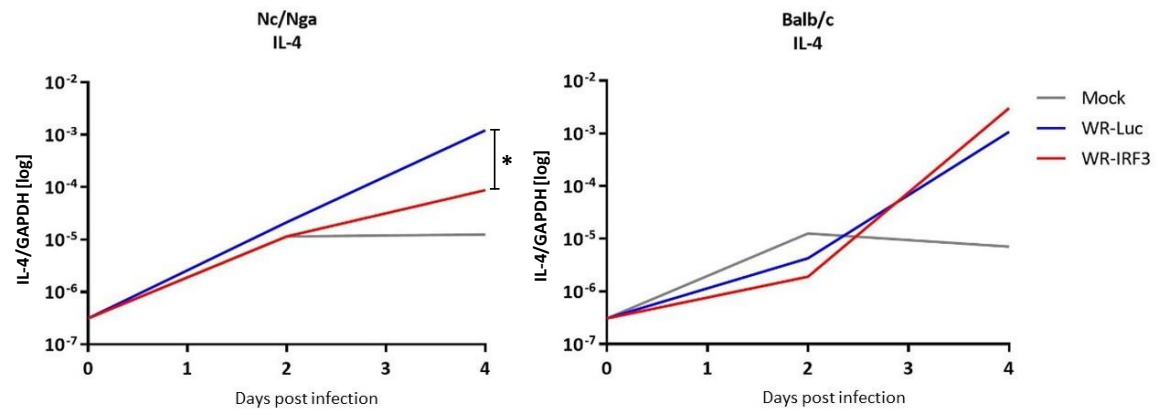

| Nc/Nga IL-4 |         |          |          | Balb/c IL-4 |         |          |          |
|-------------|---------|----------|----------|-------------|---------|----------|----------|
|             |         | GM       | *± GM SD |             |         | GM       | *± GM SD |
| T0          |         | 3,77E-07 | 2,23     | T0          |         | 3,09E-07 | 28,50    |
| Day 2       | mock    | 1,15E-05 | 1,44     | Day 2       | mock    | 1,27E-05 | 3,05     |
|             | WR-Luc  | 2,13E-05 | 1,56     |             | WR-Luc  | 1,38E-06 | 16,59    |
|             | WR-IRF3 | 1,15E-05 | 2,03     |             | WR-IRF3 | 1,92E-06 | 36,01    |
|             |         |          |          |             |         |          |          |
| Day 4       | mock    | 1,25E-05 | 1,77     | Day 4       | mock    | 7,11E-06 | 2,49     |
|             | WR-Luc  | 1,22E-03 | 1,61     |             | WR-Luc  | 1,07E-03 | 1,99     |
|             | WR-IRF3 | 8,81E-05 | 3,51     |             | WR-IRF3 | 3,03E-03 | 2,53     |

  

| Nc/Nga IL-4            |  |        |         | Balb/c IL-4            |  |        |         |
|------------------------|--|--------|---------|------------------------|--|--------|---------|
| Fold change against T0 |  | d.p.i. |         | Fold change against T0 |  | d.p.i. |         |
|                        |  | 2      | 4       |                        |  | 2      | 4       |
| mock                   |  | 30,58  | 33,24   | mock                   |  | 41,02  | 23,01   |
| WR-Luc                 |  | 56,63  | 3237,69 | WR-Luc                 |  | 4,47   | 3472,88 |
| WR-IRF3                |  | 30,62  | 233,96  | WR-IRF3                |  | 6,21   | 9810,77 |

  

| Nc/Nga IL-4                            |  |        |       | Balb/c IL-4                            |  |        |        |
|----------------------------------------|--|--------|-------|----------------------------------------|--|--------|--------|
| Fold change against mock-infected mice |  | d.p.i. |       | Fold change against mock-infected mice |  | d.p.i. |        |
|                                        |  | 2      | 4     |                                        |  | 2      | 4      |
| WR-Luc                                 |  | 1,85   | 97,41 | WR-Luc                                 |  | 0,34   | 150,92 |
| WR-IRF3                                |  | 1,00   | 7,04  | WR-IRF3                                |  | 0,15   | 426,34 |

  

| Balb/c IL-4                            |  |        |        | Balb/c IL-4                            |  |        |        |
|----------------------------------------|--|--------|--------|----------------------------------------|--|--------|--------|
| Fold change against mock-infected mice |  | d.p.i. |        | Fold change against mock-infected mice |  | d.p.i. |        |
|                                        |  | 2      | 4      |                                        |  | 2      | 4      |
| WR-Luc                                 |  | 0,34   | 150,92 | WR-Luc                                 |  | 0,34   | 150,92 |
| WR-IRF3                                |  | 0,15   | 426,34 | WR-IRF3                                |  | 0,15   | 426,34 |

(f)

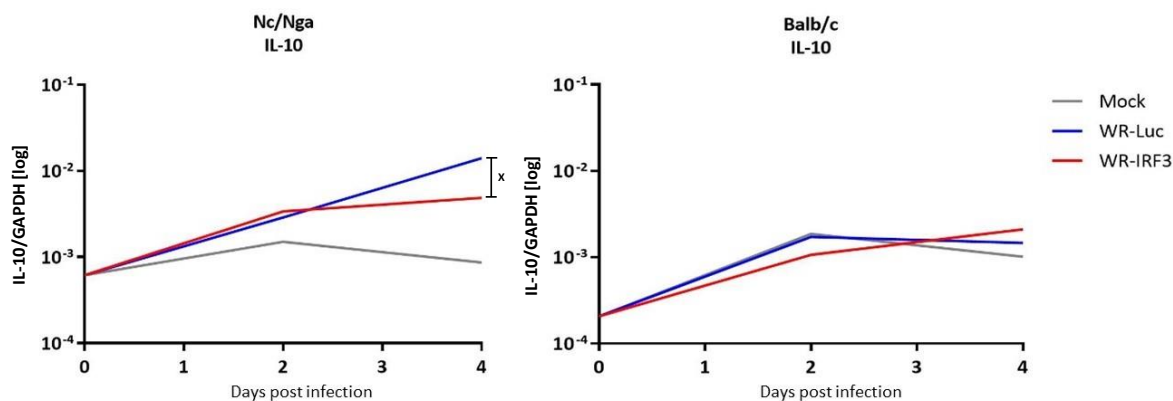

|       |         | GM       | *± GM SD |       |         | GM       | *± GM SD |
|-------|---------|----------|----------|-------|---------|----------|----------|
| T0    |         | 6,16E-04 | 1,99     |       |         | 2,06E-04 | 1,19     |
| Day 2 | mock    | 1,50E-03 | 1,68     | Day 4 | mock    | 8,65E-04 | 1,38     |
|       | WR-Luc  | 2,87E-03 | 1,68     |       | WR-Luc  | 1,40E-02 | 2,03     |
|       | WR-IRF3 | 3,38E-03 | 3,86     |       | WR-IRF3 | 4,86E-03 | 1,41     |

|       |         | GM       | *± GM SD |       |         | GM       | *± GM SD |
|-------|---------|----------|----------|-------|---------|----------|----------|
| T0    |         | 1,86E-03 | 1,55     |       |         | 1,01E-03 | 1,21     |
| Day 2 | mock    | 1,50E-03 | 1,68     | Day 4 | mock    | 1,01E-03 | 1,21     |
|       | WR-Luc  | 2,87E-03 | 1,68     |       | WR-Luc  | 1,46E-03 | 1,36     |
|       | WR-IRF3 | 3,38E-03 | 3,86     |       | WR-IRF3 | 2,10E-03 | 1,81     |

| Fold change against T0 |      |       |  | Fold change against mock-infected mice |      |       |  |
|------------------------|------|-------|--|----------------------------------------|------|-------|--|
| d.p.i.                 | 2    | 4     |  | d.p.i.                                 | 2    | 4     |  |
| mock                   | 2,43 | 1,41  |  | WR-Luc                                 | 1,91 | 16,12 |  |
| WR-Luc                 | 4,65 | 22,66 |  | WR-IRF3                                | 2,25 | 5,61  |  |
| WR-IRF3                | 5,49 | 7,89  |  |                                        |      |       |  |

| Fold change against T0 |      |       |  | Fold change against mock-infected mice |      |      |  |
|------------------------|------|-------|--|----------------------------------------|------|------|--|
| d.p.i.                 | 2    | 4     |  | d.p.i.                                 | 2    | 4    |  |
| mock                   | 9,02 | 4,91  |  | WR-Luc                                 | 0,92 | 1,44 |  |
| WR-Luc                 | 8,29 | 7,08  |  | WR-IRF3                                | 0,57 | 2,08 |  |
| WR-IRF3                | 5,16 | 10,19 |  |                                        |      |      |  |

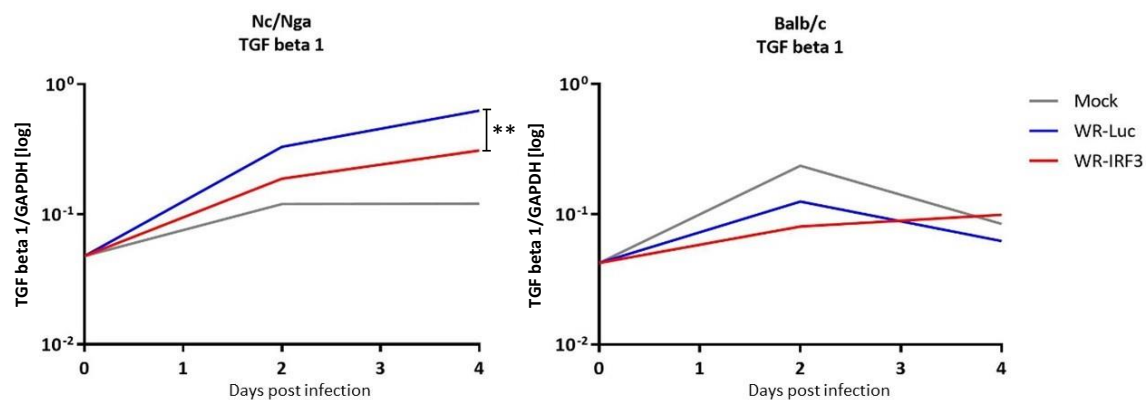

|       |         | GM       | *± GM SD |       |         | GM       | *± GM SD |
|-------|---------|----------|----------|-------|---------|----------|----------|
| T0    |         | 4,77E-02 | 1,35     |       |         | 4,22E-02 | 1,49     |
| Day 2 | mock    | 1,20E-01 | 1,93     | Day 4 | mock    | 1,21E-01 | 3,73     |
|       | WR-Luc  | 3,31E-01 | 1,58     |       | WR-Luc  | 6,28E-01 | 1,06     |
|       | WR-IRF3 | 1,88E-01 | 3,42     |       | WR-IRF3 | 3,10E-01 | 1,27     |

|       |         | GM       | *± GM SD |       |         | GM       | *± GM SD |
|-------|---------|----------|----------|-------|---------|----------|----------|
| T0    |         | 2,36E-01 | 1,37     |       |         | 8,44E-02 | 3,93     |
| Day 2 | mock    | 1,20E-01 | 1,93     | Day 4 | mock    | 8,44E-02 | 3,93     |
|       | WR-Luc  | 3,31E-01 | 1,58     |       | WR-Luc  | 6,23E-02 | 1,30     |
|       | WR-IRF3 | 1,88E-01 | 3,42     |       | WR-IRF3 | 9,92E-02 | 2,10     |

| Fold change against T0 |      |       |  | Fold change against mock-infected mice |      |      |  |
|------------------------|------|-------|--|----------------------------------------|------|------|--|
| d.p.i.                 | 2    | 4     |  | d.p.i.                                 | 2    | 4    |  |
| mock                   | 2,52 | 2,53  |  | WR-Luc                                 | 2,75 | 5,21 |  |
| WR-Luc                 | 6,93 | 13,15 |  | WR-IRF3                                | 1,56 | 2,57 |  |
| WR-IRF3                | 3,95 | 6,49  |  |                                        |      |      |  |

| Fold change against T0 |      |      |  | Fold change against mock-infected mice |      |      |  |
|------------------------|------|------|--|----------------------------------------|------|------|--|
| d.p.i.                 | 2    | 4    |  | d.p.i.                                 | 2    | 4    |  |
| mock                   | 5,61 | 2,00 |  | WR-Luc                                 | 0,53 | 0,74 |  |
| WR-Luc                 | 2,97 | 1,48 |  | WR-IRF3                                | 0,34 | 1,18 |  |
| WR-IRF3                | 1,91 | 2,35 |  |                                        |      |      |  |

(g)

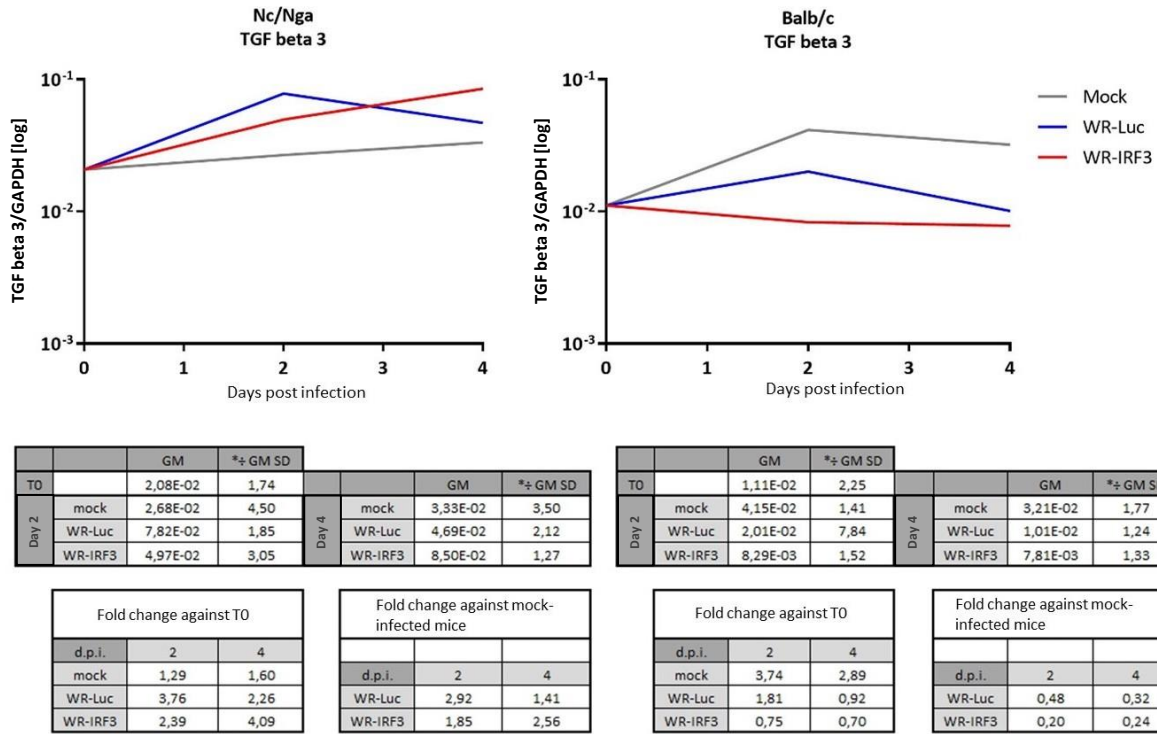

**Figure S5.** Changes in cytokine mRNA levels in mouse skin lesions. Nc/Nga and Balb/c mice were transdermally inoculated with PBS or  $7.5 \times 10^5$  PFU/mouse of purified WR-Luc or WR-IRF3, sacrificed at indicated days p.i., and RNA from skin lesions used for 1-step RT-qPCR analysis. Cytokine mRNA was normalized to GAPDH mRNA and expressed as geometrical means;  $n = 3$  mice/group. Statistically significant differences at  $^* P < 0.1$ ,  $^* P < 0.05$ ,  $^{**} P < 0.01$ ,  $^{***} P < 0.001$  (two-tailed unpaired Student t-test). GM  $\pm$  GM SD and relative changes compared to time 0 and to mock-infected samples are listed in accompanying tables. Mock – mock-inoculated mice (administration of PBS); WR-Luc – mice inoculated with VACV expressing luciferase; WR-IRF3 – mice inoculated with VACV expressing Mu IRF-3; T0 – time of inoculation; d.p.i. – days post infection; GM – geometrical mean, GM SD – geometric standard deviation.
